# Supplementary material for: N-glycan profiling of tissue samples to aid breast cancer subtyping
Source: PubMed Central journal article supplement (PMC10764792; doi:10.1038/s41598-023-51021-3), 2024-01-03
Supplement: 41598_2023_51021_MOESM5_ESM.pdf [file 41598_2023_51021_MOESM5_ESM.pdf]

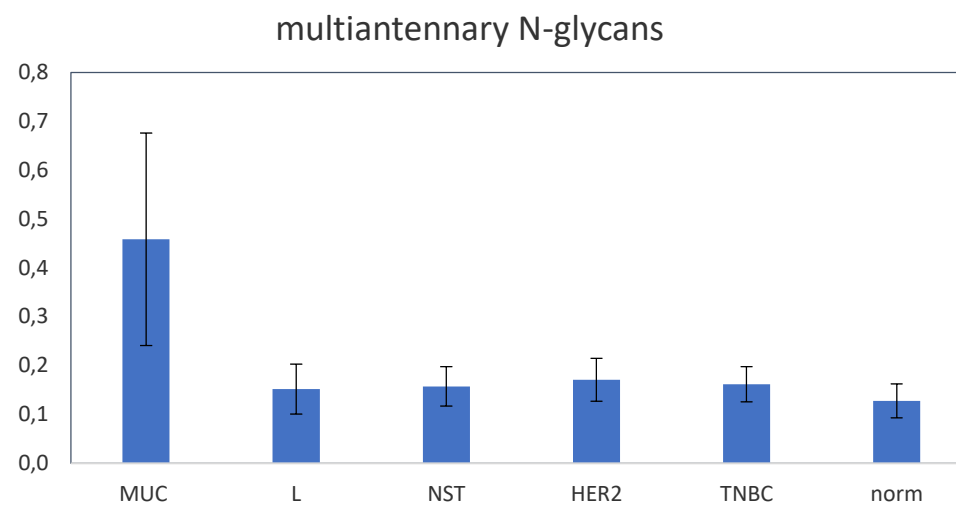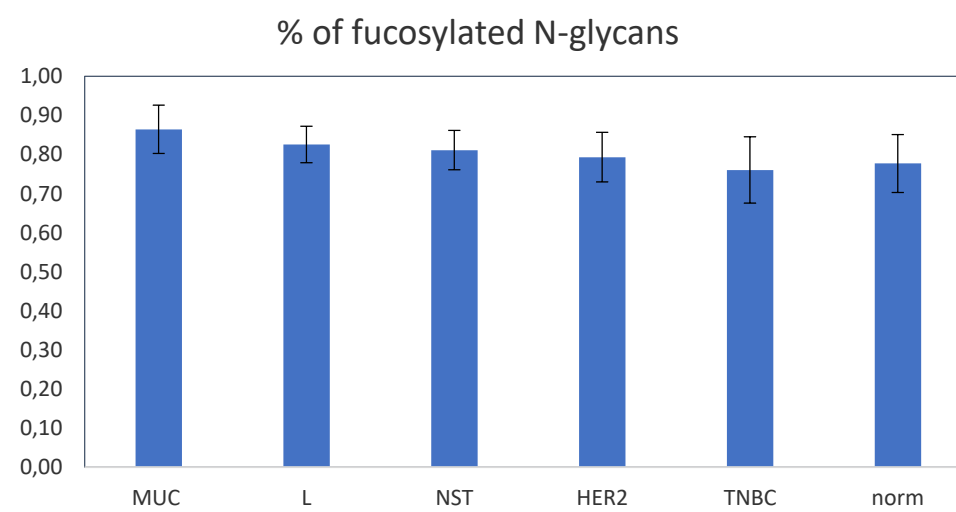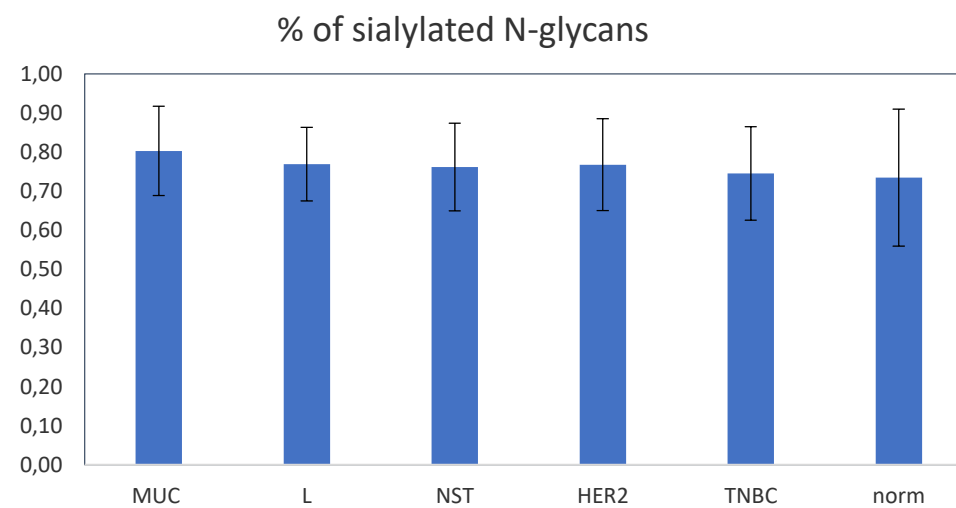

### Changes in sialylated and fucosylated N-glycan structures.

Graphs show the percentage of multi-antennary N-glycans in each breast cancer subtype (top graph), fucosylated N-glycans (middle graph), and sialylated N-glycans (bottom graph), y-axes indicate percentages in decimal form.
