# Supplementary material for: N-glycan profiling of tissue samples to aid breast cancer subtyping
Source: PubMed Central journal article supplement (PMC10764792; doi:10.1038/s41598-023-51021-3), 2024-01-03
Supplement: 41598_2023_51021_MOESM9_ESM.pdf [file 41598_2023_51021_MOESM9_ESM.pdf]

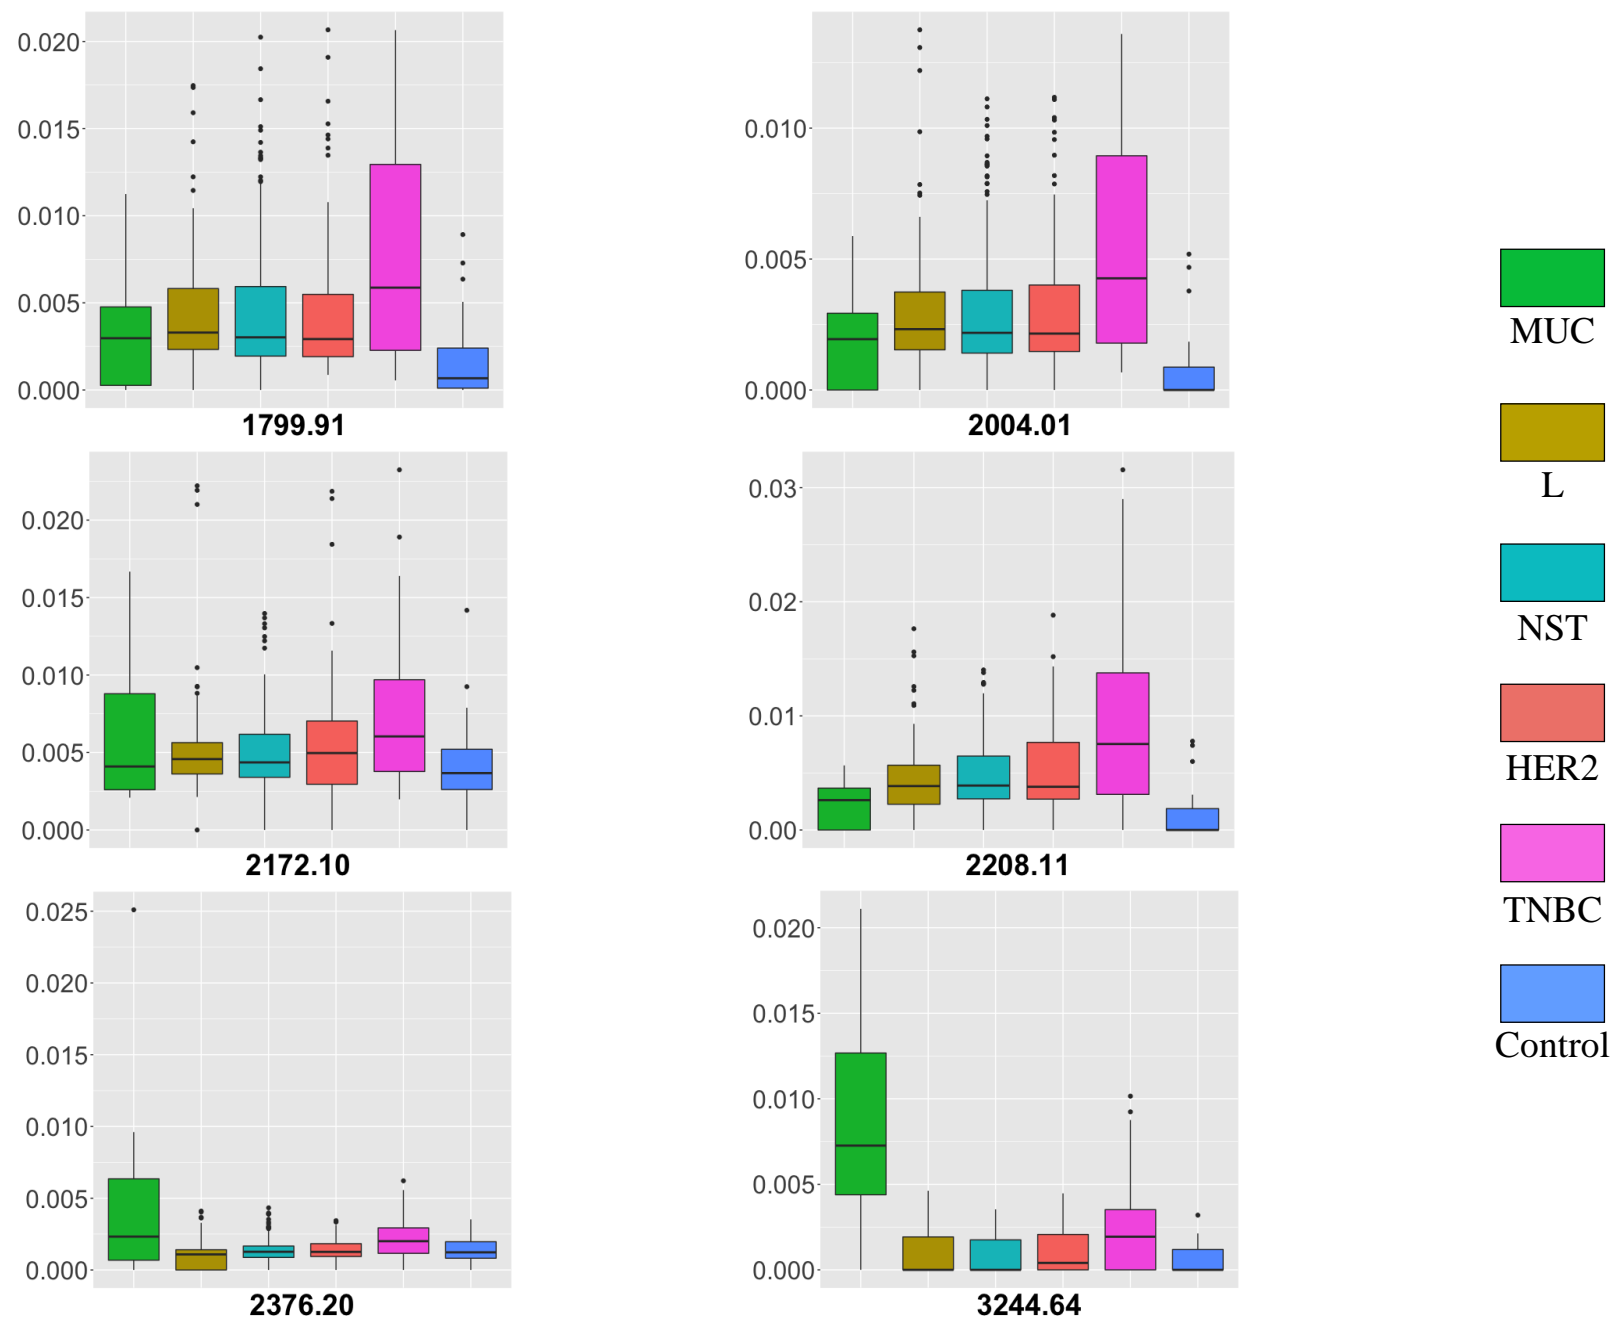

**Changes of selected altered N-glycan signals in TNBC tissue samples compared to MUC, L, NST, HER2 subtypes, and controls.**  
 Box plots of normalized peak area (AUCn) of representative N-glycans in the subgroups and table with expanded information.
