# Supplementary material for: N-glycan profiling of tissue samples to aid breast cancer subtyping
Source: PubMed Central journal article supplement (PMC10764792; doi:10.1038/s41598-023-51021-3), 2024-01-03
Supplement: 41598_2023_51021_MOESM13_ESM.pdf [file 41598_2023_51021_MOESM13_ESM.pdf]

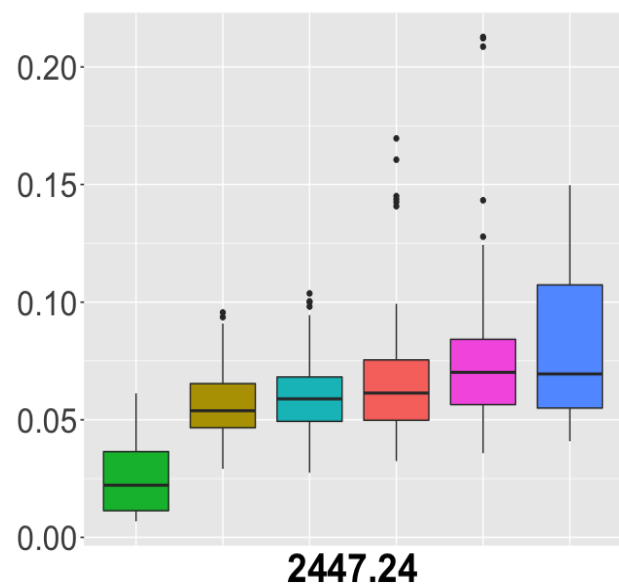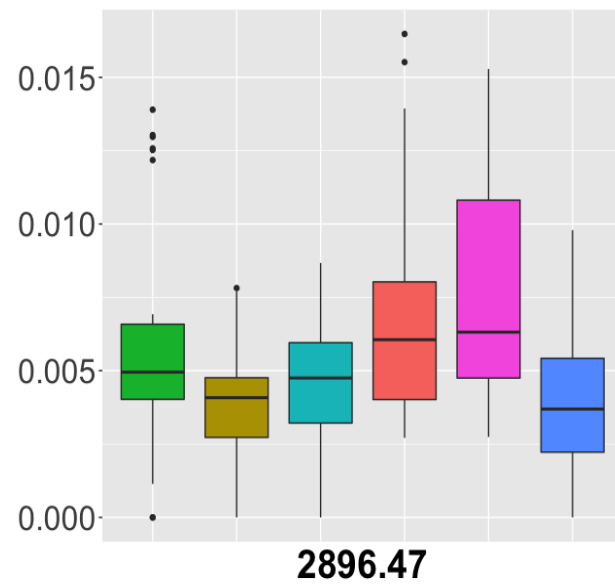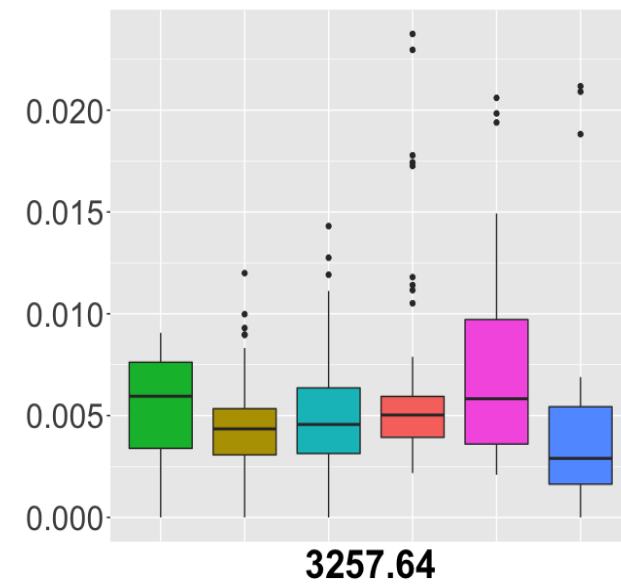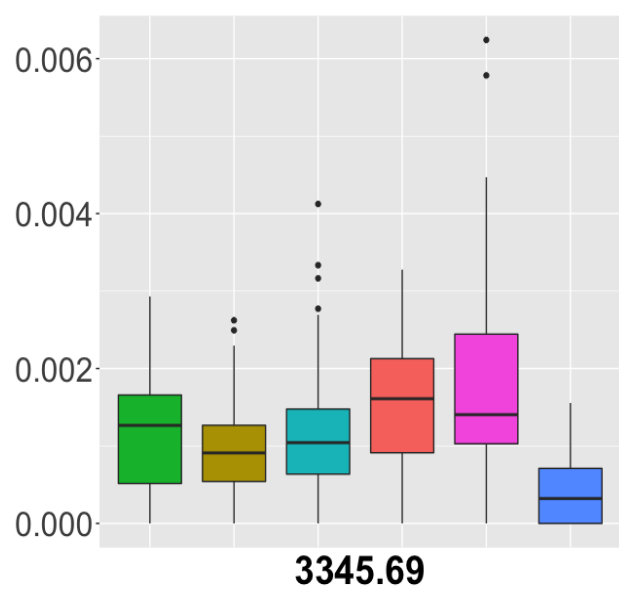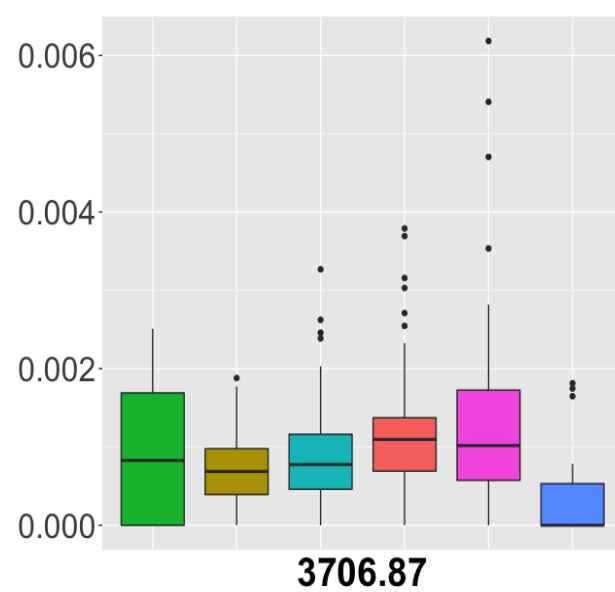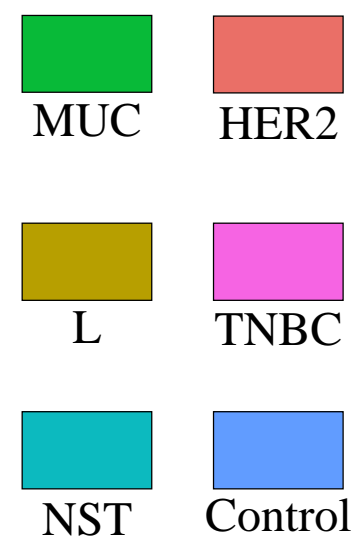

**Changes of selected altered N-glycan signals in NST or L tissue samples compared to MUC, TNBC, HER2 subtypes, and controls.** Box plots of normalized peak area (AUCn) of representative N-glycan in the subgroups and table with expanded information.
